# Supplementary material for: Facile synthesis of zirconium phosphonate-functionalized magnetic mesoporous silica microspheres designed for highly selective enrichment of phosphopeptides
Source: Royal Society of Chemistry journal article supplement (doi:10.1039/c0nr00896f), 2011-01-01
Supplement: c0nr00896f.pdf [file c0nr00896f.pdf]

**Table S1.** Detail information of the phosphopeptides enriched from tryptic digests of rat brain using zirconium phosphate-modified magnetic mesoporous microspheres.

| Index | Peptide Sequence                                   | MH+     | DeltaM | Charge | Xcorr | DeltaCn | Ions   | pI   | MSn     | Protein Description                                                                                                | Sp   | RSp |
|-------|----------------------------------------------------|---------|--------|--------|-------|---------|--------|------|---------|--------------------------------------------------------------------------------------------------------------------|------|-----|
| 1     | .FTGYQTIQQSSSE<br>TEGEGGNTADAS*S<br>*EEEGDRVEDGK.  | 4183.64 | -1.206 | 3      | 8.79  | 0.2     | 61/296 | 3.57 | MS2&MS3 | IPI:IPI00204130.1<br>Gene_Symbol=Hdgfrp3<br>Hepatoma-derived growth<br>factor-related protein 3                    | 759  | 1   |
| 2     | .FTGYQTIQQSS*S<br>ETEGEGGNTADAS*<br>S*EEEGDRVEDGK. | 4263.61 | -1.412 | 3      | 7.68  | 0.1     | 67/370 | 3.57 | MS2&MS3 | IPI:IPI00204130.1<br>Gene_Symbol=Hdgfrp3<br>Hepatoma-derived growth<br>factor-related protein 3                    | 698  | 1   |
| 3     | .TPEELEDDS*DFEQ<br>EDYDVR.                         | 2410.91 | -1.220 | 2      | 7.41  | 0.4     | 35/54  | 3.16 | MS2&MS3 | IPI:IPI00870129.1<br>Gene_Symbol=Ctnna2<br>catenin (cadherin associated<br>protein), alpha 2                       | 1280 | 1   |
| 4     | .IEKLPS*ISDLDSIFG<br>PVLS*PK.                      | 2415.19 | -1.883 | 2      | 7.16  | 0.1     | 47/80  | 4.35 | MS2&MS3 | IPI:IPI00358365.3<br>Gene_Symbol=Sgip1<br>similar to SH3-domain<br>GRB2-like (endophilin)<br>interacting protein 1 | 1016 | 1   |
| 5     | .ASRVPS*S*DEEVV<br>EEPQSR.                         | 2160.88 | -0.476 | 2      | 6.54  | 0.3     | 42/68  | 4.05 | MS2&MS3 | IPI:IPI00372789.3<br>Gene_Symbol=tnks1bp1<br>similar to tankyrase<br>1-binding protein of 182<br>kDa               | 927  | 1   |

|    |                                  |         |        |   |      |     |        |      |         |                                                                                                                                         |      |   |
|----|----------------------------------|---------|--------|---|------|-----|--------|------|---------|-----------------------------------------------------------------------------------------------------------------------------------------|------|---|
| 6  | .TAKDS*DDDDVTVDR.                | 1946.79 | -0.603 | 2 | 6.40 | 0.1 | 32/48  | 3.52 | MS2&MS3 | IPI:IPI00324381.5<br>Gene_Symbol=Stx1a<br>Syntaxin-1A                                                                                   | 1179 | 1 |
| 7  | .FIDKDQQPS*GS*EGEDDDAEAAALKK.    | 2753.12 | -1.671 | 3 | 6.38 | 0.5 | 55/184 | 3.82 | MS2&MS3 | IPI:IPI00359917.1<br>Gene_Symbol=Thumpd1<br>THUMP domain containing 1                                                                   | 439  | 1 |
| 8  | .T*DDVSEKT*S*LA<br>DQEEVR.       | 2161.80 | -0.696 | 2 | 6.31 | 0.2 | 40/80  | 3.79 | MS2&MS3 | IPI:IPI00193361.5<br>Gene_Symbol=Atp8a1<br>similar to ATPase,<br>aminophospholipid<br>transporter (APLT), class I,<br>type 8A, member 1 | 612  | 2 |
| 9  | .T*ADS*S*S*SEDEE<br>EYVVEK.      | 2223.66 | -0.642 | 2 | 6.25 | 0.4 | 42/96  | 3.41 | MS2&MS3 | IPI:IPI00214953.3<br>Gene_Symbol=Cbx5<br>Chromobox homolog 5<br>(Drosophila HP1a)<br>(Predicted), isoform CRA_a                         | 947  | 5 |
| 10 | .S*LSDSES*EDED<br>DYQQK.         | 2177.70 | -0.381 | 2 | 6.15 | 0.3 | 43/64  | 3.15 | MS2&MS3 | IPI:IPI00208277.1<br>Gene_Symbol=Pdap1<br>28 kDa heat- and acid-stable<br>phosphoprotein                                                | 1507 | 1 |
| 11 | .AKTDHGAEIVYKS<br>*PVVS*GDT*SPR. | 2654.13 | -0.977 | 3 | 6.14 | 0.1 | 67/220 | 7.79 | MS2&MS3 | IPI:IPI00230972.2<br>Gene_Symbol=Mapt<br>Isoform Tau-E of<br>Microtubule-associated                                                     | 718  | 2 |

|    |                                   |         |        |   |      |     |        |      |         |                                                                                                                                         |      |   |
|----|-----------------------------------|---------|--------|---|------|-----|--------|------|---------|-----------------------------------------------------------------------------------------------------------------------------------------|------|---|
|    |                                   |         |        |   |      |     |        |      |         | protein tau                                                                                                                             |      |   |
| 12 | .AEGYEKTDDVS*E<br>KT*S*LADQEEVR.  | 2839.10 | -1.752 | 3 | 6.12 | 0.2 | 65/220 | 3.92 | MS2&MS3 | IPI:IPI00193361.5<br>Gene_Symbol=Atp8a1<br>similar to ATPase,<br>aminophospholipid<br>transporter (APLT), class I,<br>type 8A, member 1 | 813  | 1 |
| 13 | .TY*ETPPPS*PGLDP<br>TFSNQPVPDAVR. | 2939.29 | -1.309 | 3 | 6.12 | 0.1 | 58/200 | 3.74 | MS2&MS3 | IPI:IPI00372934.3<br>Gene_Symbol=Mpp2<br>similar to MAGUK p55<br>subfamily member 2                                                     | 1355 | 3 |
| 14 | .RQS*S*VTSQSQDV<br>ASLSSPSR.      | 2266.97 | -0.308 | 2 | 6.03 | 0.1 | 38/76  | 10.6 | MS2&MS3 | IPI:IPI00558864.1<br>Gene_Symbol=Atp2b2<br>Protein                                                                                      | 966  | 1 |
| 15 | .KLEKEEEEGISQES<br>*S*EEEQ.       | 2396.93 | -0.426 | 2 | 5.95 | 0.3 | 39/72  | 3.76 | MS2&MS3 | IPI:IPI00203725.2<br>Gene_Symbol=Hmg1<br>Isoform HMG-I of High<br>mobility group protein<br>HMG-I/HMG-Y                                 | 742  | 1 |
| 16 | .KAEDS*DS*EPEPE<br>DNVR.          | 1976.72 | -1.771 | 2 | 5.75 | 0.4 | 39/60  | 3.72 | MS2&MS3 | IPI:IPI00357938.4<br>Gene_Symbol=Xrm2 5'-3'<br>exoribonuclease 2                                                                        | 729  | 1 |
| 17 | .GNKS*PS*PPPDGS*<br>PAATPEIR.     | 2214.89 | -1.121 | 2 | 5.67 | 0.2 | 43/95  | 7.08 | MS2&MS3 | IPI:IPI00196509.2<br>Gene_Symbol=Bin1<br>Isoform AMPH2-1 of Myc<br>box-dependent-interacting                                            | 907  | 1 |

|    |                                 |         |        |   |      |     |        |      |         |                                                                                                        |      |   |
|----|---------------------------------|---------|--------|---|------|-----|--------|------|---------|--------------------------------------------------------------------------------------------------------|------|---|
|    |                                 |         |        |   |      |     |        |      |         | protein 1                                                                                              |      |   |
| 18 | .VSEEDQS*LENS*E<br>ADVK.        | 1938.73 | -1.699 | 2 | 5.45 | 0.3 | 37/60  | 3.47 | MS2&MS3 | IPI:IPI00192286.1<br>Gene_Symbol=Abca2<br>ATP-binding cassette<br>sub-family A member 2                | 995  | 1 |
| 19 | .S*RTAS*LT*SAAS*<br>IDGSR.      | 1899.67 | -1.153 | 2 | 5.35 | 0.1 | 38/90  | 10.7 | MS2&MS3 | IPI:IPI00326606.4<br>Gene_Symbol=Ndr2<br>Isoform 2 of Protein<br>NDRG2                                 | 386  | 4 |
| 20 | .AKTDHGAEIVYKS<br>*PVVS*GDT*PR. | 2654.13 | -1.856 | 3 | 5.28 | 0.1 | 60/220 | 7.79 | MS2&MS3 | IPI:IPI00230972.2<br>Gene_Symbol=Mapt<br>Isoform Tau-E of<br>Microtubule-associated<br>protein tau     | 668  | 1 |
| 21 | .S*HS*SPLNPDAS*<br>PVTAK.       | 1934.73 | -0.731 | 2 | 5.28 | 0.1 | 44/80  | 7.59 | MS2&MS3 | IPI:IPI00358275.3<br>Gene_Symbol=Psd3 similar<br>to Pleckstrin and Sec7<br>domain containing protein 3 | 1444 | 3 |
| 22 | R.S*RT*AS*LTSAA<br>SIDGSR.S     | 1819.70 | -0.811 | 2 | 5.25 | 0.1 | 40/75  | 10.7 | MS2&MS3 | IPI:IPI00326606.4<br>Gene_Symbol=Ndr2<br>Isoform 2 of Protein<br>NDRG2                                 | 833  | 1 |
| 23 | .TDHGAEIVYKS*PV<br>VS*GDT*SPR.  | 2455.00 | -1.530 | 2 | 5.24 | 0.1 | 45/100 | 5.3  | MS2&MS3 | IPI:IPI00230972.2<br>Gene_Symbol=Mapt<br>Isoform Tau-E of<br>Microtubule-associated                    | 434  | 2 |

|    |                                        |         |        |   |      |     |        |      |         |                                                                                                    |     |    |
|----|----------------------------------------|---------|--------|---|------|-----|--------|------|---------|----------------------------------------------------------------------------------------------------|-----|----|
|    |                                        |         |        |   |      |     |        |      |         | protein tau                                                                                        |     |    |
| 24 | .SPA EAKS*PAEAKS<br>*PAEAK.            | 1928.84 | -0.160 | 3 | 5.13 | 0.3 | 53/136 | 6.96 | MS2&MS3 | IPI:IPI00188524.2<br>Gene_Symbol=Nefh<br>Neurofilament heavy<br>polypeptide                        | 914 | 1  |
| 25 | .SLS*TSGESLYHVL<br>GLDK.               | 1885.89 | -0.707 | 2 | 5.12 | 0.1 | 27/48  | 5.24 | MS2&MS3 | IPI:IPI00210881.1<br>Gene_Symbol=Dnajc5 DnaJ<br>homolog subfamily C<br>member 5                    | 575 | 2  |
| 26 | .AKTDHGAEIVYKS<br>PVVS*GDTS*PR.        | 2574.16 | -0.360 | 3 | 5.03 | 0.1 | 46/176 | 7.79 | MS2&MS3 | IPI:IPI00230972.2<br>Gene_Symbol=Mapt<br>Isoform Tau-E of<br>Microtubule-associated<br>protein tau | 536 | 12 |
| 27 | .KGAE EEEEEEDDD<br>S*EEEEIK.           | 2318.86 | -1.700 | 2 | 4.81 | 0.3 | 32/54  | 3.46 | MS2&MS3 | IPI:IPI00778976.1<br>Gene_Symbol=Epb4.9 45<br>kDa protein                                          | 548 | 1  |
| 28 | .S*AGSSSPEAGEDS<br>*DHEDGNYCPPVK<br>R. | 2908.08 | -1.314 | 3 | 4.80 | 0.2 | 46/200 | 4.1  | MS2&MS3 | IPI:IPI00558170.2<br>Gene_Symbol=Ranbp3<br>similar to RAN binding<br>protein 3 isoform<br>RANBP3-b | 476 | 4  |
| 29 | .GNKS*PS*PPPDGS<br>PAATPEIR.           | 2134.92 | -0.452 | 2 | 4.69 | 0.2 | 39/76  | 7.08 | MS2&MS3 | IPI:IPI00196509.2<br>Gene_Symbol=Bin1<br>Isoform AMPH2-1 of Myc<br>box-dependent-interacting       | 785 | 1  |

|    |                                |         |        |   |      |     |        |      |         |                                                                                                           |     |   |
|----|--------------------------------|---------|--------|---|------|-----|--------|------|---------|-----------------------------------------------------------------------------------------------------------|-----|---|
|    |                                |         |        |   |      |     |        |      |         | protein 1                                                                                                 |     |   |
| 30 | .TDHGAEIVY*KSPV<br>VS*GDT*SPR. | 2455.00 | 0.095  | 2 | 4.66 | 0.3 | 34/100 | 5.3  | MS2&MS3 | IPI:IPI00230972.2<br>Gene_Symbol=Mapt<br>Isoform Tau-E of<br>Microtubule-associated<br>protein tau        | 246 | 6 |
| 31 | .ESLKEEDES*DDDN<br>M.          | 1735.59 | -0.346 | 2 | 4.63 | 0.3 | 24/39  | 3.25 | MS2&MS3 | IPI:IPI00476178.3<br>Gene_Symbol=Psm31;Psm<br>a3 Proteasome subunit alpha<br>type-3                       | 766 | 1 |
| 32 | .EQES*S*GEEDNDL<br>SPEER.      | 2109.72 | -0.700 | 2 | 4.55 | 0.3 | 30/64  | 3.36 | MS2&MS3 | IPI:IPI00400646.7<br>Gene_Symbol=Ppp1r2<br>Protein phosphatase<br>inhibitor 2                             | 901 | 1 |
| 33 | .GNKS*PSPPPDGS*<br>PAATPEIR.   | 2134.92 | -1.578 | 2 | 4.43 | 0.2 | 31/76  | 7.08 | MS2&MS3 | IPI:IPI00196509.2<br>Gene_Symbol=Bin1<br>Isoform AMPH2-1 of Myc<br>box-dependent-interacting<br>protein 1 | 488 | 4 |
| 34 | .S*HSSPS*LNPDASP<br>VTAK.      | 1854.77 | -0.083 | 2 | 4.24 | 0.1 | 33/64  | 7.59 | MS2&MS3 | IPI:IPI00358275.3<br>Gene_Symbol=Psd3 similar<br>to Pleckstrin and Sec7<br>domain containing protein 3    | 769 | 4 |
| 35 | .NIVTPRT*PPPSQG<br>K.          | 1571.79 | -0.398 | 2 | 4.17 | 0.2 | 26/39  | 11.5 | MS2&MS3 | IPI:IPI00231265.2<br>Gene_Symbol=Mbp Isoform<br>5 of Myelin basic protein S                               | 714 | 1 |

|    |                              |         |        |   |      |     |       |      |         |                                                                                                           |      |    |
|----|------------------------------|---------|--------|---|------|-----|-------|------|---------|-----------------------------------------------------------------------------------------------------------|------|----|
| 36 | .S*RTAS*LTSAASID<br>GSR.     | 1739.74 | 0.059  | 2 | 4.17 | 0.2 | 34/60 | 10.7 | MS2&MS3 | IPI:IPI00326606.4<br>Gene_Symbol=Ndr2<br>Isoform 2 of Protein<br>NDRG2                                    | 541  | 2  |
| 37 | .SRS*PGT*PAGEGS<br>GSPPK.    | 1728.70 | -0.654 | 2 | 4.13 | 0.2 | 38/64 | 9.85 | MS2&MS3 | IPI:IPI00231810.1<br>Gene_Symbol=Add1<br>Isoform 2 of Alpha-adducin                                       | 1062 | 1  |
| 38 | .SPA EAKS*PAEAKS<br>*PAEAK.  | 1928.84 | -0.776 | 2 | 4.09 | 0.2 | 23/68 | 6.96 | MS2&MS3 | IPI:IPI00188524.2<br>Gene_Symbol=Nefh<br>Neurofilament heavy<br>polypeptide                               | 262  | 11 |
| 39 | .S*LSDPKPLSPT*AE<br>ESAK.    | 1916.83 | -0.683 | 2 | 3.93 | 0.3 | 34/64 | 4.49 | MS2&MS3 | IPI:IPI00212553.3<br>Gene_Symbol=Bsn Protein<br>bassoon                                                   | 446  | 1  |
| 40 | .SPVVS*GDTS*PR.              | 1261.49 | -0.287 | 2 | 3.90 | 0.1 | 32/40 | 6.55 | MS2&MS3 | IPI:IPI00230972.2<br>Gene_Symbol=Mapt<br>Isoform Tau-E of<br>Microtubule-associated<br>protein tau        | 1216 | 1  |
| 41 | .GNKSPS*PPPDGS*<br>PAATPEIR. | 2134.92 | -1.769 | 2 | 3.90 | 0.4 | 32/76 | 7.08 | MS2&MS3 | IPI:IPI00196509.2<br>Gene_Symbol=Bin1<br>Isoform AMPH2-1 of Myc<br>box-dependent-interacting<br>protein 1 | 385  | 6  |
| 42 | .VKGSNYHLS*DND<br>AS*DVE.    | 2009.75 | -1.421 | 2 | 3.84 | 0.3 | 37/64 | 4    | MS2&MS3 | IPI:IPI00201395.3<br>Gene_Symbol=Slc2a13                                                                  | 612  | 1  |

|    |                            |         |        |   |      |     |       |      |         | Proton myo-inositol cotransporter                                                          |     |    |
|----|----------------------------|---------|--------|---|------|-----|-------|------|---------|--------------------------------------------------------------------------------------------|-----|----|
| 43 | .S*LDS*DESEDEDD<br>DYQQR.  | 2333.80 | -0.247 | 2 | 3.82 | 0.5 | 27/68 | 3.48 | MS2&MS3 | IPI:IPI00208277.1<br>Gene_Symbol=Pdap1 28<br>kDa heat- and acid-stable<br>phosphoprotein   | 293 | 2  |
| 44 | .VVSS*T*SEEEAF<br>TEK.     | 1831.69 | -0.804 | 2 | 3.80 | 0.2 | 27/56 | 3.71 | MS2&MS3 | IPI:IPI00199013.7<br>Gene_Symbol=Oxr1<br>Isoform 1 of Oxidation<br>resistance protein 1    | 493 | 6  |
| 45 | .THT*SPPRAPS*SPG<br>R.     | 1607.67 | -0.249 | 2 | 3.78 | 0.2 | 27/52 | 12.5 | MS2&MS3 | IPI:IPI00373257.3<br>Gene_Symbol=- 45 kDa<br>protein                                       | 352 | 5  |
| 46 | .S*ADVS*PTTEGVK<br>.       | 1350.52 | -1.875 | 2 | 3.73 | 0.1 | 28/44 | 4.11 | MS2&MS3 | IPI:IPI00763055.1<br>Gene_Symbol=Trim2<br>tripartite motif-containing 2                    | 637 | 1  |
| 47 | .SENSS*T*QSSPEM<br>PTTK.   | 1870.68 | -0.785 | 2 | 3.60 | 0.2 | 24/60 | 4.31 | MS2&MS3 | IPI:IPI00359567.3<br>Gene_Symbol=Rap1gap<br>similar to Rap1<br>GTPase-activating protein 1 | 329 | 11 |
| 48 | .SM#S*DPKPLSPT*<br>ADESSR. | 1980.77 | -1.861 | 2 | 3.57 | 0.1 | 30/64 | 4.35 | MS2&MS3 | IPI:IPI00203018.1<br>Gene_Symbol=Pclo Isoform<br>1 of Protein piccolo                      | 624 | 1  |
| 49 | .DTDAYSDLS*DGE<br>KEAR.    | 1851.73 | -1.195 | 2 | 3.42 | 0.3 | 27/45 | 3.73 | MS2&MS3 | IPI:IPI00213940.3<br>Gene_Symbol=Fam131b<br>Protein FAM131B                                | 425 | 1  |



|    |                                                 |         |        |   |      |     |        |      |         |                                                                                                    |      |    |
|----|-------------------------------------------------|---------|--------|---|------|-----|--------|------|---------|----------------------------------------------------------------------------------------------------|------|----|
| 50 | .SEGPQLLT*PPQTS*<br>PR.                         | 1767.77 | -1.944 | 2 | 3.36 | 0.2 | 30/56  | 6.75 | MS2&MS3 | IPI:IPI00944228.1<br>Gene_Symbol=LOC685202<br>coiled-coil domain<br>containing 48 like             | 639  | 1  |
| 51 | .MAVDS*S*MELLF<br>LDTFK.                        | 2038.82 | -0.590 | 2 | 3.27 | 0.2 | 22/60  | 3.74 | MS2&MS3 | IPI:IPI00366816.4<br>Gene_Symbol=RGD155990<br>4 hypothetical protein<br>LOC313061                  | 431  | 3  |
| 52 | .VKGSNYHLS*DND<br>AS*DVE.                       | 2009.75 | -1.879 | 2 | 3.27 | 0.2 | 25/64  | 4    | MS2&MS3 | IPI:IPI00201395.3<br>Gene_Symbol=Slc2a13<br>Proton myo-inositol<br>cotransporter                   | 154  | 32 |
| 53 | .GSNYHLS*DNDAS<br>*DVE.                         | 1782.59 | -0.325 | 2 | 3.25 | 0.2 | 34/56  | 3.53 | MS2&MS3 | IPI:IPI00201395.3<br>Gene_Symbol=Slc2a13<br>Proton myo-inositol<br>cotransporter                   | 535  | 2  |
| 54 | .SGYS*S*PGS*PGTP<br>GSR.                        | 1633.53 | -1.670 | 2 | 3.21 | 0.1 | 39/70  | 9.65 | MS2&MS3 | IPI:IPI00230972.2<br>Gene_Symbol=Mapt<br>Isoform Tau-E of<br>Microtubule-associated<br>protein tau | 845  | 1  |
| 55 | .MNVPETMNEVLD<br>MS*DDEGEDAITGD<br>TDKYLGPQDLK. | 4065.72 | -1.717 | 3 | 7.62 | 0.2 | 58/210 | 3.38 | MS2     | IPI:IPI00389129.3<br>Gene_Symbol=Ank3<br>Ankyrin G197                                              | 1355 | 1  |
| 56 | .AEPEKS*EGAAEEQ<br>PEPAPAPEQEAAP                | 3645.62 | -1.167 | 3 | 7.39 | 0.5 | 56/216 | 3.76 | MS2     | IPI:IPI00231651.6<br>Gene_Symbol=Basp1 Brain                                                       | 1075 | 1  |

|    |                                           |         |        |   |      |     |        |      |     |                                                                                                                    |                        |   |  |
|----|-------------------------------------------|---------|--------|---|------|-----|--------|------|-----|--------------------------------------------------------------------------------------------------------------------|------------------------|---|--|
|    | GPAAGGEAPK.                               |         |        |   |      |     |        |      |     |                                                                                                                    | acid soluble protein 1 |   |  |
| 57 | .TPEELEDDSD*DFEQ<br>EDYDVR.               | 2410.91 | -1.527 | 2 | 7.21 | 0.4 | 33/54  | 3.16 | MS2 | IPI:IPI00870129.1<br>Tax_Id=10116<br>Gene_Symbol=Ctnna2<br>catenin (cadherin associated<br>protein), alpha 2       | 1416                   | 1 |  |
| 58 | .IEKLPS*ISDLDSIFG<br>PVLS*PK.             | 2415.19 | -1.883 | 2 | 7.16 | 0.1 | 47/80  | 4.35 | MS2 | IPI:IPI00358365.3<br>Gene_Symbol=Sgip1<br>similar to SH3-domain<br>GRB2-like (endophilin)<br>interacting protein 1 | 1016                   | 1 |  |
| 59 | .GGQDDDDAETGLT<br>*EGEGEGEEKEPE<br>NLGK.  | 3214.27 | -0.962 | 3 | 7.09 | 0.4 | 59/174 | 3.42 | MS2 | IPI:IPI00201467.1<br>Gene_Symbol=Syt2<br>Synaptotagmin-2                                                           | 1367                   | 1 |  |
| 60 | .VSEEAESQWDTS<br>KGDQVSQNGLP<br>AEQGS*PR. | 3424.49 | -1.760 | 3 | 7.08 | 0.3 | 54/180 | 3.86 | MS2 | IPI:IPI00373419.2<br>Gene_Symbol=Sptbn1<br>Non-erythrocyte<br>beta-spectrin                                        | 1462                   | 1 |  |
| 61 | .TPEELDDSD*DFETE<br>DFDVR.                | 2238.86 | -1.026 | 2 | 6.83 | 0.2 | 34/51  | 3.19 | MS2 | IPI:IPI00358406.2<br>Gene_Symbol=Ctnna1<br>Catenin<br>(Cadherin-associated<br>protein), alpha 1, isoform<br>CRA_b  | 1223                   | 1 |  |
| 62 | .LNPETMTEVLDV<br>S*DEEGDDTVTGDG           | 4017.77 | -1.990 | 3 | 6.70 | 0.2 | 49/210 | 3.39 | MS2 | IPI:IPI00205634.4<br>Gene_Symbol=Ank2 similar                                                                      | 859                    | 1 |  |

|    |                                    |         |        |   |      |     |        |      |     |                                                                                                                         |                        |   |  |
|----|------------------------------------|---------|--------|---|------|-----|--------|------|-----|-------------------------------------------------------------------------------------------------------------------------|------------------------|---|--|
|    | GEYLRPEDLK.                        |         |        |   |      |     |        |      |     |                                                                                                                         | to ankyrin 2 isoform 2 |   |  |
| 63 | .KVSDVTSSGVQS*F<br>DEEEGDANN.      | 2393.96 | -1.803 | 2 | 6.42 | 0.2 | 40/63  | 3.4  | MS2 | IPI: IPI00213940.3<br>Gene_Symbol=Fam131b<br>Protein FAM131B                                                            | 1580                   | 1 |  |
| 64 | .ANS*FVGTAQYVS<br>PELLTEK.         | 2134.01 | -1.791 | 2 | 6.40 | 0.2 | 35/54  | 4.31 | MS2 | IPI: IPI00195987.1<br>Gene_Symbol=Pdpk1<br>3-phosphoinositide-depende<br>nt protein kinase 1                            | 1994                   | 1 |  |
| 65 | .NIDQSEFEGFS*FV<br>NSEFLKPEVK.     | 2770.26 | -1.957 | 3 | 6.27 | 0.2 | 45/132 | 4.05 | MS2 | IPI: IPI00189278.4<br>Gene_Symbol=Prkcb<br>Isoform Beta-II of Protein<br>kinase C beta type                             | 938                    | 1 |  |
| 66 | .IYQFPDCDS*DEDE<br>DFKLQDQALK.     | 2899.20 | -0.814 | 3 | 6.27 | 0.4 | 44/132 | 3.52 | MS2 | IPI: IPI00421642.1<br>Gene_Symbol=Sept4<br>EG3RVC                                                                       | 1069                   | 1 |  |
| 67 | .TAKDS*DDDDVT<br>VTVDR.            | 1946.79 | -0.548 | 2 | 6.24 | 0.1 | 35/48  | 3.52 | MS2 | IPI: IPI00324381.5<br>Gene_Symbol=Stx1a<br>Syntaxin-1A                                                                  | 1531                   | 1 |  |
| 68 | .T*WTLCGTPEYLA<br>PEILSK.          | 2272.10 | -1.193 | 2 | 6.03 | 0.3 | 33/54  | 4.31 | MS2 | IPI: IPI00200013.4<br>Gene_Symbol=Prkaca<br>Isoform 1 of<br>cAMP-dependent protein<br>kinase catalytic subunit<br>alpha | 1327                   | 1 |  |
| 69 | .RAPPGPLPPAASPG<br>PPAAS*PPAAPSSPR | 2648.33 | -1.392 | 3 | 5.89 | 0.5 | 57/162 | 12.5 | MS2 | IPI: IPI00464877.2<br>Gene_Symbol=Hcn2                                                                                  | 2030                   | 3 |  |

|    |                                                  |         |        |   |      |     |        |      |     |                                                                                                               |      |   |
|----|--------------------------------------------------|---------|--------|---|------|-----|--------|------|-----|---------------------------------------------------------------------------------------------------------------|------|---|
|    |                                                  |         |        |   |      |     |        |      |     | Potassium/sodium hyperpolarization-activated cyclic nucleotide-gated channel 2                                |      |   |
| 70 | .NLLEDDS*DEEEDFLR.                               | 2065.83 | -1.860 | 2 | 5.84 | 0.4 | 30/45  | 3.26 | MS2 | IPI:IPI00358945.2<br>Gene_Symbol=Vamp4 16 kDa protein                                                         | 2243 | 1 |
| 71 | .FSEMMDHMGGDE<br>DVDLPEVDGADDD<br>SQDS*DDEKMPDLE | 4310.57 | -1.073 | 3 | 5.83 | 0.6 | 51/222 | 3.14 | MS2 | IPI:IPI00365935.3<br>Gene_Symbol=Ptges3<br>Prostaglandin E synthase 3                                         | 1086 | 1 |
| 72 | .RAS*VCAEAYNPD<br>EEEDDAESR.                     | 2492.95 | -0.892 | 2 | 5.79 | 0.4 | 37/60  | 3.66 | MS2 | IPI:IPI00365600.3<br>Gene_Symbol=Prkar2b<br>cAMP-dependent protein kinase type II-beta regulatory subunit     | 942  | 1 |
| 73 | .SAKDS*DDEEEVV<br>HVDR.                          | 1909.78 | -1.329 | 3 | 5.74 | 0.2 | 43/90  | 3.94 | MS2 | IPI:IPI00191730.1<br>Gene_Symbol=Stx1b<br>Syntaxin-1B                                                         | 1419 | 1 |
| 74 | .TWT*LCGTPEYLA<br>PEIILSK.                       | 2272.10 | -0.784 | 2 | 5.71 | 0.3 | 32/54  | 4.31 | MS2 | IPI:IPI00200013.4<br>Gene_Symbol=Prkaca<br>Isoform 1 of cAMP-dependent protein kinase catalytic subunit alpha | 1317 | 1 |
| 75 | .S*ASPDDDLSSN                                    | 2514.99 | -0.917 | 2 | 5.65 | 0.3 | 27/66  | 3.3  | MS2 | IPI:IPI00371185.2                                                                                             | 1202 | 1 |

|    |                                                |         |        |   |      |     |        |      |     |                                                                                                                    |      |    |
|----|------------------------------------------------|---------|--------|---|------|-----|--------|------|-----|--------------------------------------------------------------------------------------------------------------------|------|----|
|    | WEAADLGNEER.                                   |         |        |   |      |     |        |      |     | Gene_Symbol=RGD131170<br>3 Similar to sid2057p                                                                     |      |    |
| 76 | .RGGGSGGGDES*E<br>GEEVDED.                     | 1917.66 | -1.620 | 2 | 5.34 | 0.2 | 33/54  | 3.3  | MS2 | IPI:IPI00189358.2<br>Gene_Symbol=Purb<br>Transcriptional activator<br>protein Pur-beta                             | 1045 | 1  |
| 77 | .GATPAEDDEDNDI<br>DLFGS*DEEEEDKE<br>AAR.       | 3262.27 | -1.862 | 3 | 5.33 | 0.4 | 43/168 | 3.31 | MS2 | IPI:IPI00197900.5<br>Gene_Symbol=Eef1d<br>Translation elongation factor<br>1-delta subunit                         | 543  | 1  |
| 78 | .GHDLSPLAS*DILT<br>NTSGSMDEGDDYL<br>PPTTPAVEK. | 3723.66 | -1.391 | 3 | 5.31 | 0.1 | 46/204 | 3.61 | MS2 | IPI:IPI00206171.1<br>Gene_Symbol=Map2<br>Isoform MAP2x of<br>Microtubule-associated<br>protein 2                   | 614  | 2  |
| 79 | .ST*GGPPGPGPLPG<br>PQGLSSSSGSR.                | 2214.02 | -1.505 | 2 | 5.15 | 0.4 | 29/69  | 10.9 | MS2 | IPI:IPI00768248.1<br>Gene_Symbol=Agap2<br>Arf-GAP with GTPase,<br>ANK repeat and PH<br>domain-containing protein 2 | 646  | 1  |
| 80 | .GVVTNGLDVS*PA<br>EEK.                         | 1594.74 | -1.732 | 2 | 5.08 | 0.3 | 32/42  | 3.87 | MS2 | IPI:IPI00325609.4<br>Gene_Symbol=Nefm<br>Neurofilament medium<br>polypeptide                                       | 2113 | 1  |
| 81 | .IYQFPDCDS*DEDE<br>DFKLQDQALK.                 | 2899.20 | -1.508 | 3 | 4.98 | 0.3 | 31/132 | 3.52 | MS2 | IPI:IPI00421642.1<br>Gene_Symbol=Sept4                                                                             | 464  | 47 |

|    |                                              |         |        |   |      |     |        |      |     |                                                                                            | EG3RVC |   |  |
|----|----------------------------------------------|---------|--------|---|------|-----|--------|------|-----|--------------------------------------------------------------------------------------------|--------|---|--|
| 82 | .DWEDDS*DEDMSN<br>FDR.                       | 1955.63 | 0.011  | 2 | 4.94 | 0.3 | 30/42  | 3.18 | MS2 | IPI:IPI00365935.3<br>Gene_Symbol=Ptges3<br>Prostaglandin E synthase 3                      | 2339   | 1 |  |
| 83 | .VDIITEEMPENALP<br>S*DEDDKDPNDPYR            | 3197.35 | -1.714 | 3 | 4.90 | 0.2 | 45/156 | 3.45 | MS2 | IPI:IPI00198486.3<br>Gene_Symbol=Ap3d1<br>Ap3d1 protein                                    | 1338   | 1 |  |
| 84 | .NIDQSEFEGFSFVN<br>S*EFLKPEVK.               | 2770.26 | -1.652 | 3 | 4.85 | 0.4 | 43/132 | 4.05 | MS2 | IPI:IPI00189278.4<br>Gene_Symbol=Prkcb<br>Isoform Beta-II of Protein<br>kinase C beta type | 860    | 1 |  |
| 85 | .GTGLQPGEELPDI<br>APPLVT*PDEPK.              | 2679.28 | -0.898 | 2 | 4.85 | 0.4 | 26/72  | 3.47 | MS2 | IPI:IPI00207657.1<br>Gene_Symbol=Usp5<br>ubiquitin specific peptidase<br>5                 | 961    | 1 |  |
| 86 | .ESLKEEDES*DDDN<br>M.                        | 1735.59 | -0.743 | 2 | 4.81 | 0.3 | 24/39  | 3.25 | MS2 | IPI:IPI00476178.3<br>Gene_Symbol=Psm31;Psm<br>a3 Proteasome subunit alpha<br>type-3        | 633    | 1 |  |
| 87 | .MESEAGADDS*AE<br>EGDLLDDDDNEDR<br>GDDQLELK. | 3691.42 | -1.937 | 3 | 4.80 | 0.4 | 45/192 | 3.2  | MS2 | IPI:IPI00187860.3<br>Gene_Symbol=Hnrnpc<br>Heterogeneous nuclear<br>ribonucleoprotein C    | 552    | 1 |  |
| 88 | .AFYGSEEDEAKGP<br>GS*EEAATAALPAR             | 2704.18 | -1.854 | 3 | 4.77 | 0.5 | 41/150 | 3.93 | MS2 | IPI:IPI00767753.2<br>Gene_Symbol=Ap3b2<br>adaptor-related protein                          | 1229   | 3 |  |

|    |                                             |         |        |   |      |     |        |      |     |                                                                                                                    |      |   |
|----|---------------------------------------------|---------|--------|---|------|-----|--------|------|-----|--------------------------------------------------------------------------------------------------------------------|------|---|
|    |                                             |         |        |   |      |     |        |      |     | complex 3, beta 2 subunit                                                                                          |      |   |
| 89 | .LTVEEATASVSEG<br>GGLQGIS*MKDSDE<br>EDEEDD. | 3422.38 | -0.814 | 3 | 4.74 | 0.4 | 40/186 | 3.1  | MS2 | IPI:IPI00199604.4<br>Gene_Symbol=Cadps<br>Protein                                                                  | 854  | 2 |
| 90 | .KGAEEDDDDD<br>S*EEEEIK.                    | 2318.86 | -0.648 | 2 | 4.74 | 0.2 | 30/54  | 3.46 | MS2 | IPI:IPI00778976.1<br>Gene_Symbol=Epb4.9 45<br>kDa protein                                                          | 468  | 1 |
| 91 | .TGS*PLTVATGND<br>QAATEAK.                  | 1911.87 | -1.000 | 2 | 4.69 | 0.2 | 25/54  | 4.11 | MS2 | IPI:IPI00358365.3<br>Gene_Symbol=Sgip1<br>similar to SH3-domain<br>GRB2-like (endophilin)<br>interacting protein 1 | 646  | 2 |
| 92 | .GLYDGPVCEVSVT<br>*PK.                      | 1700.76 | -0.717 | 2 | 4.61 | 0.2 | 28/42  | 4.11 | MS2 | IPI:IPI00870112.1<br>Gene_Symbol=Dpysl2<br>Dihydropyrimidinase-related<br>protein 2                                | 1918 | 1 |
| 93 | .T*PEELDDDFETE<br>DFDVR.                    | 2238.86 | -0.743 | 2 | 4.55 | 0.5 | 32/51  | 3.19 | MS2 | IPI:IPI00358406.2<br>Gene_Symbol=Ctnna1<br>Catenin<br>(Cadherin-associated<br>protein), alpha 1, isoform<br>CRA_b  | 1161 | 2 |
| 94 | .AGAYDFPS*PEWD<br>TVTPEAK.                  | 2160.92 | -0.854 | 2 | 4.51 | 0.1 | 24/54  | 3.62 | MS2 | IPI:IPI00192337.1<br>Gene_Symbol=Camk2a<br>Calcium/calmodulin-depend<br>ent protein kinase type II                 | 539  | 1 |

|     |                                          |         |        |   |      |     |        |      |     |                                                                                            |      |    |
|-----|------------------------------------------|---------|--------|---|------|-----|--------|------|-----|--------------------------------------------------------------------------------------------|------|----|
|     |                                          |         |        |   |      |     |        |      |     | alpha chain                                                                                |      |    |
| 95  | .GDQVSQNGLPAEQ<br>GS*PR.                 | 1819.80 | -0.584 | 2 | 4.48 | 0.3 | 27/48  | 4.11 | MS2 | IPI:IPI00373419.2<br>Gene_Symbol=Sptbn1<br>Non-erythrocyte<br>beta-spectrin                | 454  | 1  |
| 96  | .EEAS*DDDMEGDE<br>AVVR.                  | 1862.66 | -0.865 | 2 | 4.48 | 0.5 | 26/45  | 3.26 | MS2 | IPI:IPI00373118.2<br>Gene_Symbol=Ascc311 79<br>kDa protein                                 | 889  | 1  |
| 97  | .ARPSQLPEQSSSAQ<br>QNGSVSDIS*PVQA<br>AK. | 3047.44 | 0.213  | 3 | 4.48 | 0.2 | 38/168 | 7.12 | MS2 | IPI:IPI00367933.4<br>Gene_Symbol=Kif2a<br>Isoform 2 of Kinesin-like<br>protein KIF2A       | 584  | 27 |
| 98  | .S*LDGEVGTGQYA<br>TTK.                   | 1606.70 | -0.332 | 2 | 4.46 | 0.4 | 26/42  | 4.11 | MS2 | IPI:IPI00204503.1<br>Gene_Symbol=Epb4.113<br>Type II brain 4.1 minor<br>isoform            | 1100 | 1  |
| 99  | .IEDVGS*DEEDDSG<br>KDK.                  | 1817.70 | -1.610 | 2 | 4.42 | 0.4 | 27/45  | 3.56 | MS2 | IPI:IPI00471584.7<br>Gene_Symbol=Hsp90ab1<br>Heat shock protein HSP<br>90-beta             | 291  | 3  |
| 100 | .TFCGT*PDYIAPEII<br>AYQPYGK.             | 2484.12 | -0.406 | 2 | 4.35 | 0.3 | 28/60  | 4.11 | MS2 | IPI:IPI00189278.4<br>Gene_Symbol=Prkcb<br>Isoform Beta-II of Protein<br>kinase C beta type | 860  | 2  |
| 101 | .KLS*GDQITLPTTV<br>DYSSVPK.              | 2229.11 | -1.109 | 2 | 4.34 | 0.4 | 29/57  | 6.57 | MS2 | IPI:IPI00366400.1<br>Gene_Symbol=Ebag9                                                     | 614  | 1  |



|     |                             |         |        |   |      |     |       |      |     |                                                                                        |      |   |
|-----|-----------------------------|---------|--------|---|------|-----|-------|------|-----|----------------------------------------------------------------------------------------|------|---|
|     |                             |         |        |   |      |     |       |      |     | Receptor-binding cancer antigen expressed on SiSo cells (Fragment)                     |      |   |
| 102 | .DQNLQILEESRS*<br>E.        | 1737.77 | -0.814 | 2 | 4.31 | 0.1 | 27/39 | 3.72 | MS2 | IPI:IPI00208699.1<br>Gene_Symbol=Cntnap1<br>Contactin-associated protein 1             | 1249 | 1 |
| 103 | .NIVTPRT*PPPSQG<br>K.       | 1571.79 | -0.737 | 2 | 4.21 | 0.2 | 28/39 | 11.5 | MS2 | IPI:IPI00231265.2<br>Gene_Symbol=Mbp Isoform 5 of Myelin basic protein S               | 851  | 1 |
| 104 | .KEESEES*EDDMGF<br>GLFD.    | 2043.74 | -0.742 | 2 | 4.20 | 0.2 | 26/48 | 3.3  | MS2 | IPI:IPI00200145.1<br>Gene_Symbol=Rplp1 60S<br>acidic ribosomal protein P1              | 1022 | 1 |
| 105 | .GASS*PDMEPSYG<br>GGLFDMVK. | 2124.87 | -1.220 | 2 | 4.16 | 0.4 | 21/57 | 3.74 | MS2 | IPI:IPI00358350.3<br>Gene_Symbol=Dnajc6 DnaJ<br>(Hsp40) homolog, subfamily C, member 6 | 378  | 1 |
| 106 | .IGFGPS*PFSLTEGL<br>PK.     | 1726.85 | -1.336 | 2 | 4.15 | 0.1 | 28/45 | 7.01 | MS2 | IPI:IPI00188524.2<br>Gene_Symbol=Nefh<br>Neurofilament heavy polypeptide               | 804  | 1 |
| 107 | .S*PDTSAYCYETM<br>EK.       | 1761.64 | -0.709 | 2 | 4.12 | 0.2 | 23/39 | 3.87 | MS2 | IPI:IPI00372009.3<br>Gene_Symbol=Map1b<br>microtubule-associated protein 1B            | 633  | 1 |
| 108 | .SLS*TSGESLYHVL             | 1885.89 | -0.928 | 2 | 4.05 | 0.1 | 28/48 | 5.24 | MS2 | IPI:IPI00210881.1                                                                      | 380  | 2 |

|     |                             |         |        |   |      |     |       |      |     |                                                                                           |                                                      |   |  |
|-----|-----------------------------|---------|--------|---|------|-----|-------|------|-----|-------------------------------------------------------------------------------------------|------------------------------------------------------|---|--|
|     | GLDK.                       |         |        |   |      |     |       |      |     |                                                                                           | Gene_Symbol=Dnajc5 DnaJ homolog subfamily C member 5 |   |  |
| 109 | .T*ASL TSAASIDGSR.          | 1416.64 | -0.781 | 2 | 3.98 | 0.2 | 28/39 | 6.5  | MS2 | IPI:IPI00326606.4<br>Gene_Symbol=Ndr g2 Isoform 2 of Protein NDRG2                        | 1195                                                 | 2 |  |
| 110 | .KEES*EESEDDMGFGLFD.        | 2043.74 | -0.668 | 2 | 3.94 | 0.2 | 25/48 | 3.3  | MS2 | IPI:IPI00200145.1<br>Gene_Symbol=Rplp1 60S acidic ribosomal protein P1                    | 965                                                  | 2 |  |
| 111 | .HPPVLT*PPDQEVIR.           | 1677.84 | -1.438 | 2 | 3.91 | 0.4 | 24/39 | 5.24 | MS2 | IPI:IPI00189278.4<br>Gene_Symbol=Prkcb Isoform Beta-II of Protein kinase C beta type      | 658                                                  | 1 |  |
| 112 | .SPVVSGDT*SPR.              | 1181.52 | -0.640 | 2 | 3.88 | 0.3 | 25/30 | 6.55 | MS2 | IPI:IPI00230972.2<br>Gene_Symbol=Mapt Isoform Tau-E of Microtubule-associated protein tau | 1370                                                 | 2 |  |
| 113 | .T*PGPLSSQGAPVDTQPAAQK.     | 2029.96 | -0.907 | 2 | 3.88 | 0.3 | 23/57 | 6.5  | MS2 | IPI:IPI00210153.4<br>Gene_Symbol=Synj1 Isoform 1 of Synaptojanin-1                        | 405                                                  | 2 |  |
| 114 | .EGDGSATTTDAAPAT*SPKAEEPSK. | 2296.98 | -1.703 | 2 | 3.86 | 0.5 | 20/66 | 3.96 | MS2 | IPI:IPI00212320.1<br>Gene_Symbol=Gap43 Neuromodulin                                       | 221                                                  | 1 |  |
| 115 | .EGDGSATTTDAAPA             | 1655.68 | -0.864 | 2 | 3.83 | 0.1 | 25/48 | 3.74 | MS2 | IPI:IPI00212320.1                                                                         | 827                                                  | 1 |  |

|     |                           |         |        |   |      |     |       |      |     |                                                                                                                |                                   |    |  |
|-----|---------------------------|---------|--------|---|------|-----|-------|------|-----|----------------------------------------------------------------------------------------------------------------|-----------------------------------|----|--|
|     | TS*PK.                    |         |        |   |      |     |       |      |     |                                                                                                                | Gene_Symbol=Gap43<br>Neuromodulin |    |  |
| 116 | .SATSSSPGS*PLHSL<br>ETSL. | 1837.82 | -0.820 | 2 | 3.81 | 0.2 | 22/51 | 5.15 | MS2 | IPI:IPI00194873.1<br>Gene_Symbol=Atp2b1<br>Isoform D of Plasma<br>membrane<br>calcium-transporting<br>ATPase 1 | 655                               | 1  |  |
| 117 | .KEESEES*DDDMG<br>FGLFD.  | 2029.73 | -0.404 | 2 | 3.77 | 0.1 | 26/48 | 3.25 | MS2 | IPI:IPI00188804.1<br>Gene_Symbol=Rplp2 60S<br>acidic ribosomal protein P2                                      | 939                               | 1  |  |
| 118 | .Y*TFQDFTEQFQVL<br>LPK.   | 2083.98 | -0.322 | 2 | 3.72 | 0.2 | 19/45 | 4.11 | MS2 | IPI:IPI00339187.3<br>Gene_Symbol=Myo9b<br>Myosin-IXb                                                           | 386                               | 40 |  |
| 119 | .SPA EAKS*PAEAK.          | 1265.58 | -0.676 | 2 | 3.68 | 0.3 | 26/33 | 6.88 | MS2 | IPI:IPI00188524.2<br>Gene_Symbol=Nefh<br>Neurofilament heavy<br>polypeptide                                    | 814                               | 1  |  |
| 120 | .GVVTNGLDVS*PA<br>EEK.    | 1594.74 | -1.648 | 2 | 3.67 | 0.3 | 22/42 | 3.87 | MS2 | IPI:IPI00325609.4<br>Gene_Symbol=Nefm<br>Neurofilament medium<br>polypeptide                                   | 455                               | 2  |  |
| 121 | .S*GDETPGSEAPGD<br>K.     | 1426.54 | -0.490 | 2 | 3.63 | 0.3 | 26/39 | 3.62 | MS2 | IPI:IPI00360386.3<br>Gene_Symbol=Hnrnpul2<br>similar to heterogeneous<br>nuclear ribonucleoprotein U           | 1100                              | 1  |  |

|     |                            |         |        |   |      |     |       |      |     |                                                                                                       |     |    |
|-----|----------------------------|---------|--------|---|------|-----|-------|------|-----|-------------------------------------------------------------------------------------------------------|-----|----|
|     |                            |         |        |   |      |     |       |      |     | isoform a                                                                                             |     |    |
| 122 | .RDS*SDDWEIPDG<br>QITVGQR. | 2253.98 | -0.655 | 2 | 3.61 | 0.1 | 20/54 | 3.8  | MS2 | IPI:IPI00373550.4<br>Gene_Symbol=Braf similar<br>to v-raf murine sarcoma<br>viral oncogene homolog B1 | 307 | 21 |
| 123 | .QQPHLQPQNT*PIM<br>PVR.    | 1963.96 | -1.445 | 2 | 3.60 | 0.3 | 23/45 | 10.8 | MS2 | IPI:IPI00778493.1 -<br>Gene_Symbol=Serpinf1 41<br>kDa protein                                         | 228 | 15 |
| 124 | .DIIRQPS*EEEIHK.           | 1649.81 | -0.944 | 2 | 3.57 | 0.1 | 24/36 | 4.21 | MS2 | IPI:IPI00555213.1<br>Gene_Symbol=Pea15a<br>Astrocytic phosphoprotein<br>PEA-15                        | 320 | 4  |
| 125 | .VDHGAEIITQS*PS<br>R.      | 1589.73 | -1.066 | 2 | 3.56 | 0.2 | 24/39 | 5.24 | MS2 | IPI:IPI00206171.1<br>Gene_Symbol=Map2<br>Isoform MAP2x of<br>Microtubule-associated<br>protein 2      | 437 | 1  |
| 126 | .LIGTAVPQRSTS*PT<br>GPK.   | 1702.89 | -1.550 | 2 | 3.55 | 0.1 | 23/45 | 11.5 | MS2 | IPI:IPI00360288.1<br>Gene_Symbol=Mapre3<br>Microtubule-associated<br>protein RP/EB family<br>member 3 | 409 | 1  |
| 127 | .TGEPDEEEGTFRSS<br>*IR.    | 1889.79 | -0.546 | 2 | 3.54 | 0.1 | 27/45 | 4.05 | MS2 | IPI:IPI00193828.1<br>Gene_Symbol=Fxyd1<br>Phospholemman                                               | 471 | 1  |
| 128 | .MRRCPIDGEAT*SD            | 2003.81 | -1.935 | 2 | 3.51 | 0.2 | 20/45 | 6.41 | MS2 | IPI:IPI00208650.1                                                                                     | 606 | 1  |

|     |                            |         |        |   |      |     |       |      |     |                                                                                                       |                                                           |    |  |
|-----|----------------------------|---------|--------|---|------|-----|-------|------|-----|-------------------------------------------------------------------------------------------------------|-----------------------------------------------------------|----|--|
|     | MDR.                       |         |        |   |      |     |       |      |     |                                                                                                       | Gene_Symbol=Dlgap4<br>Disks large-associated<br>protein 4 |    |  |
| 129 | .VQSLEGEKLS*PK.            | 1394.69 | -1.840 | 2 | 3.51 | 0.3 | 25/33 | 7.09 | MS2 | IPI:IPI00372009.3<br>Gene_Symbol=Map1b<br>microtubule-associated<br>protein 1B                        | 827                                                       | 1  |  |
| 130 | .SSSS*SSSGVGSPA<br>VTPTEK. | 1831.80 | -0.801 | 2 | 3.50 | 0.2 | 26/54 | 6.74 | MS2 | IPI:IPI00187782.2<br>Gene_Symbol=Srgap3<br>similar to SLIT-ROBO Rho<br>GTPase-activating protein 3    | 884                                                       | 2  |  |
| 131 | .KPGNNEGSGAPS*P<br>LSK.    | 1619.74 | -1.883 | 2 | 3.47 | 0.1 | 19/45 | 9.57 | MS2 | IPI:IPI00215134.1<br>Gene_Symbol=Snap91<br>Isoform Long of Clathrin<br>coat assembly protein<br>AP180 | 219                                                       | 21 |  |
| 132 | .NTPQLWSVPS*ELL<br>K.      | 1691.84 | -1.914 | 2 | 3.46 | 0.1 | 18/39 | 6.55 | MS2 | IPI:IPI00365435.4<br>Gene_Symbol=LOC683446<br>38 kDa protein                                          | 237                                                       | 68 |  |
| 133 | .IEDVGS*DEEDDSG<br>KDKK.   | 1945.79 | -0.437 | 2 | 3.46 | 0.2 | 33/48 | 3.82 | MS2 | IPI:IPI00471584.7<br>Gene_Symbol=Hsp90ab1<br>Heat shock protein HSP<br>90-beta                        | 699                                                       | 1  |  |
| 134 | .VQTT*PPPTIQGQK.           | 1474.73 | -0.408 | 2 | 3.46 | 0.1 | 24/36 | 10.1 | MS2 | IPI:IPI00556943.2<br>Gene_Symbol=Aak1 similar<br>to AP2 associated kinase 1                           | 710                                                       | 1  |  |

|     |                           |         |        |   |      |     |       |      |     |                                                                                       |      |    |
|-----|---------------------------|---------|--------|---|------|-----|-------|------|-----|---------------------------------------------------------------------------------------|------|----|
| 135 | .Y*QEFHHLRPLK.            | 1648.80 | -1.973 | 2 | 3.45 | 0.2 | 18/33 | 9.49 | MS2 | IPI:IPI00370530.4<br>Gene_Symbol=Tbc1d2b<br>TBC1 domain family,<br>member 2B          | 215  | 22 |
| 136 | .ASGQAFELILS*PR.          | 1468.72 | -0.440 | 2 | 3.43 | 0.4 | 22/36 | 7.1  | MS2 | IPI:IPI00231697.5<br>Gene_Symbol=Stmn1<br>Stathmin                                    | 1044 | 2  |
| 137 | .ASGQAFELILS*PR.          | 1468.72 | -1.663 | 2 | 3.40 | 0.3 | 24/36 | 7.1  | MS2 | IPI:IPI00231697.5<br>Gene_Symbol=Stmn1<br>Stathmin                                    | 1378 | 1  |
| 138 | .SVLWDKLNKNS*TV<br>HGGVR. | 1976.01 | -1.502 | 2 | 3.37 | 0.4 | 21/48 | 10.5 | MS2 | IPI:IPI00366881.2<br>Gene_Symbol=Lars2<br>leucyl-tRNA synthetase 2,<br>mitochondrial  | 314  | 39 |
| 139 | .GGLS*DGEGPPGG<br>R.      | 1235.51 | -0.301 | 2 | 3.36 | 0.4 | 29/36 | 4.11 | MS2 | IPI:IPI00208115.4<br>Gene_Symbol=Sv2a<br>Synaptic vesicle<br>glycoprotein 2A          | 1029 | 1  |
| 140 | .NIVTPRT*PPPSQG<br>K.     | 1571.79 | -0.603 | 2 | 3.36 | 0.2 | 20/39 | 11.5 | MS2 | IPI:IPI00231265.2<br>Gene_Symbol=Mbp Isoform<br>5 of Myelin basic protein S           | 386  | 3  |
| 141 | .KLNKTDEEISS*.            | 1343.61 | -0.905 | 2 | 3.32 | 0.4 | 21/30 | 4.49 | MS2 | IPI:IPI00205372.3<br>Gene_Symbol=Stxbp1<br>Isoform 1 of<br>Syntaxin-binding protein 1 | 238  | 9  |
| 142 | .DFQEYVEPGEDFP            | 2190.90 | -1.634 | 2 | 3.32 | 0.3 | 25/51 | 3.54 | MS2 | IPI:IPI00213552.1                                                                     | 815  | 1  |

|     |                           |         |        |   |      |     |       |      |     |                                                                                                       |                                                                         |   |  |
|-----|---------------------------|---------|--------|---|------|-----|-------|------|-----|-------------------------------------------------------------------------------------------------------|-------------------------------------------------------------------------|---|--|
|     | AS*PQR.                   |         |        |   |      |     |       |      |     |                                                                                                       | Gene_Symbol=Dync11i1<br>Cytoplasmic dynein 1 light intermediate chain 1 |   |  |
| 143 | .TASL TSAAS*IDGSR.        | 1416.64 | -1.054 | 2 | 3.30 | 0.1 | 27/39 | 6.5  | MS2 | IPI:IPI00326606.4<br>Gene_Symbol=NdrG2<br>Isoform 2 of Protein NDRG2                                  | 1017                                                                    | 1 |  |
| 144 | .TIKS*PCDSGYSYE<br>TIEK.  | 2057.88 | -0.724 | 2 | 3.28 | 0.1 | 24/48 | 4.49 | MS2 | IPI:IPI00372009.3<br>Gene_Symbol=Map1b<br>microtubule-associated protein 1B                           | 380                                                                     | 3 |  |
| 145 | .CT*LQWEDEGQVV<br>LNR.    | 1926.84 | -1.608 | 2 | 3.26 | 0.1 | 24/42 | 3.87 | MS2 | IPI:IPI00358054.3<br>Gene_Symbol=Il12rb2<br>similar to Interleukin-12 receptor beta-2 chain precursor | 889                                                                     | 2 |  |
| 146 | .HVPNS*IGFEVELQ<br>LDWQK. | 2219.05 | -1.706 | 2 | 3.26 | 0.1 | 20/51 | 4.47 | MS2 | IPI:IPI00870485.1<br>Gene_Symbol=Itga5<br>integrin alpha 5                                            | 435                                                                     | 1 |  |
| 147 | .Y*TFQDFTEQFQVL<br>LPK.   | 2083.98 | -1.108 | 2 | 3.23 | 0.1 | 21/45 | 4.11 | MS2 | IPI:IPI00339187.3<br>Gene_Symbol=Myo9b<br>Myosin-IXb                                                  | 462                                                                     | 1 |  |
| 148 | .SPFEIISPASPPEM<br>T*GQR. | 2120.97 | -0.741 | 2 | 3.23 | 0.1 | 19/54 | 4.31 | MS2 | IPI:IPI00199693.2<br>Gene_Symbol=Map1a<br>Microtubule-associated protein 1A                           | 409                                                                     | 7 |  |

|     |                            |         |        |   |      |     |       |      |     |                                                                         |     |    |
|-----|----------------------------|---------|--------|---|------|-----|-------|------|-----|-------------------------------------------------------------------------|-----|----|
| 149 | .TAS*LTSAASIDGS<br>R.      | 1416.64 | -0.332 | 2 | 3.21 | 0.2 | 20/39 | 6.5  | MS2 | IPI:IPI00326606.4<br>Gene_Symbol=Ndrp2<br>Isoform 2 of Protein<br>NDRG2 | 459 | 5  |
| 150 | .VENVKGAVWT*V<br>DEVEYQK.  | 2173.02 | -1.778 | 2 | 3.18 | 0.3 | 19/51 | 4.21 | MS2 | IPI:IPI00215203.4<br>Gene_Symbol=Foxp2<br>similar to forkhead box P2    | 341 | 72 |
| 151 | .VQPHQVDILASCN<br>LS*QGTR. | 2203.03 | -0.137 | 2 | 3.17 | 0.2 | 21/54 | 7.14 | MS2 | IPI:IPI00367050.3<br>Gene_Symbol=Cd226<br>CD226 molecule                | 375 | 9  |
| 152 | .LDKDGIPVSS*EAE<br>R.      | 1595.73 | -1.523 | 2 | 3.13 | 0.1 | 21/39 | 4.11 | MS2 | IPI:IPI00569865.1<br>Gene_Symbol=Ergic3 44<br>kDa protein               | 978 | 1  |
| 153 | .S*KEQLNSYT.               | 1149.48 | -0.804 | 2 | 3.12 | 0.5 | 19/24 | 6.72 | MS2 | IPI:IPI00206643.2<br>Gene_Symbol=Gpm6b 36<br>kDa protein                | 823 | 1  |

# Phosphorylation Site
